# Supplementary material
Source: PubMed Central journal article supplement (PMC3109597)
Supplement: supp_138.13.2693_DEV063412TableS2.pdf [file supp_138.13.2693_DEV063412TableS2.pdf]

**Table S2. The primers used for qPCR experiments**

| Gene         | Forward                         | Reverse                             |
|--------------|---------------------------------|-------------------------------------|
| <i>nvd</i>   | 5'-GGAAGCGTTGCTGACGACTGTG-3'    | 5'-TAAAGCCGTCCACTTCCTGCGA-3'        |
| <i>dib</i>   | 5'-TGCCCTCAATCCCTATCTGGTC-3'    | 5'-ACAGGGTCTTCACACCCATCTC-3'        |
| <i>spok</i>  | 5'-GCCGAGCTAAATTTCTCCGCTT-3'    | 5'-TATCTCTTGGGCACACTCGTG-3'         |
| <i>phm</i>   | 5'-GGATTTCTTTCGGCGCGATGTG-3'    | 5'-TGCCTCAGTATCGAAAAGCCGT-3'        |
| <i>sad</i>   | 5'-CCGCATTACAGCAGTCAGTGG-3'     | 5'-ACCTGCCGTGTACAAGGAGAG-3'         |
| <i>rpl23</i> | 5'-GACAACACCGGAGCCAAGAACC-3'    | 5'-GTTTGCCTGCGCAATAACCAC-3'         |
| <i>ptth</i>  | 5'-CCACGAGCTCATTTCGTAACCTTGC-3' | 5'-CACTCCACATCCCACAGAGATGGCGATGG-3' |
